# Supplementary material
Source: MDPI journal article supplement (https://www.mdpi.com/2073-445X/11/1/9)
Supplement: s1 [file s1]

Article

# Comparison of Bacterial Community in Paddy Soil after Short-Term Application of Pig Manure and the Corresponding Organic Fertilizer

Min Wang <sup>1</sup>, Chenyan Sha <sup>1</sup>, Jianqiang Wu <sup>1</sup>, Peng Li <sup>2</sup>, Juan Tan <sup>1</sup> and Shenfa Huang <sup>1,2,\*</sup>

<sup>1</sup> Shanghai Academy of Environmental Sciences, Shanghai 200233, China; wangm@saes.sh.cn (M.W.); shacy@saes.sh.cn (C.S.); wujq@saes.sh.cn (J.W.); tangj@saes.sh.cn (J.T.)

<sup>2</sup> College of Environmental Science and Engineering, Donghua University, Shanghai 201600, China; lipeng951204@163.com

\* Correspondence: huangsf@saes.sh.cn; Tel.: +86-640851192321

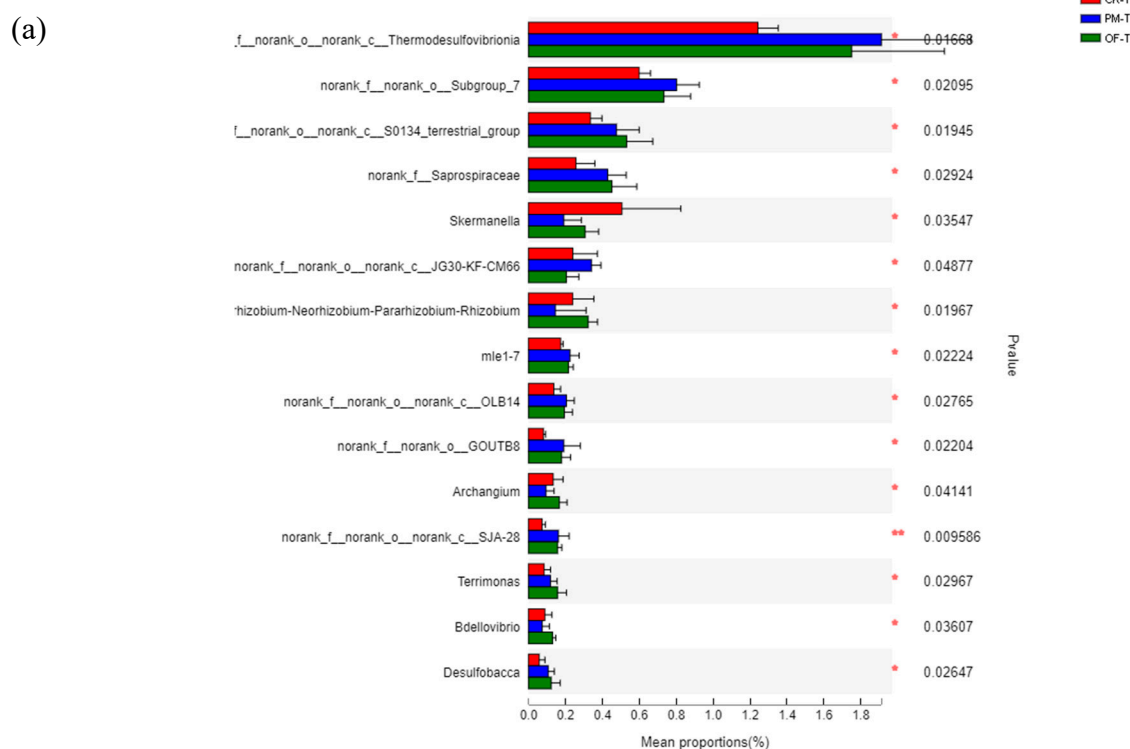

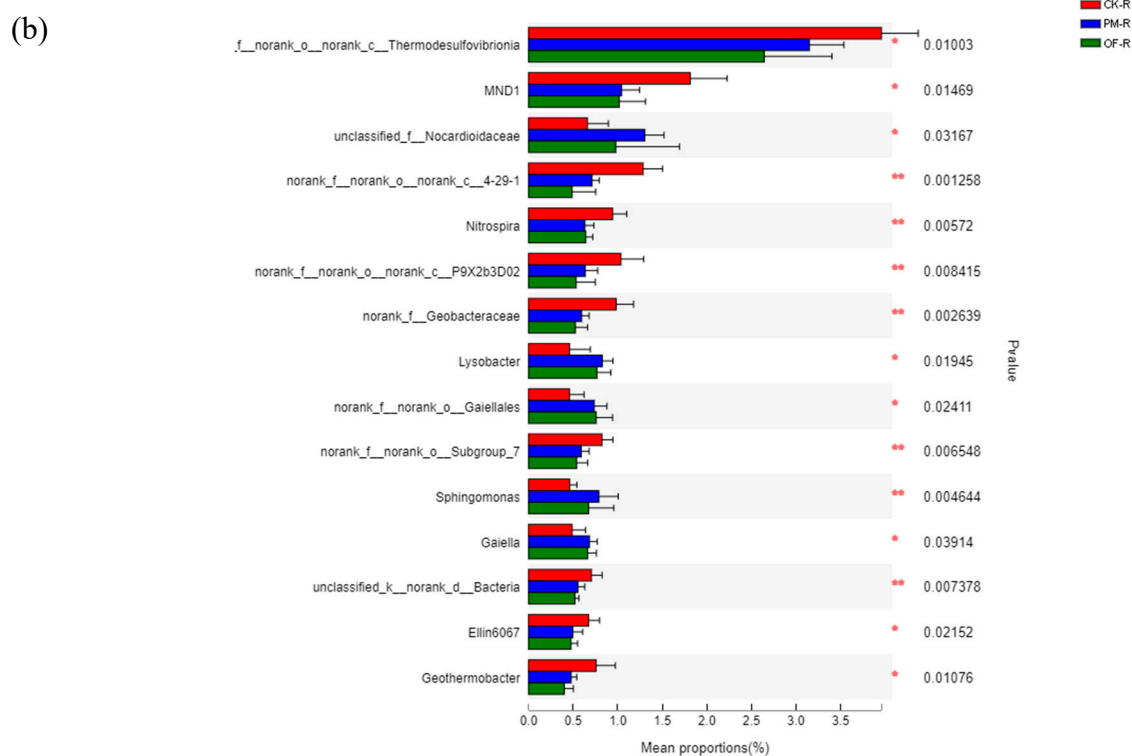

**Figure S1.** The comparison of differential bacteria between treatment tests based on the relative abundance at genus level during heading stage (a): tillering stage; (b): ripening stage (CK: control; PM: pig manure; OF: organic fertilizer).

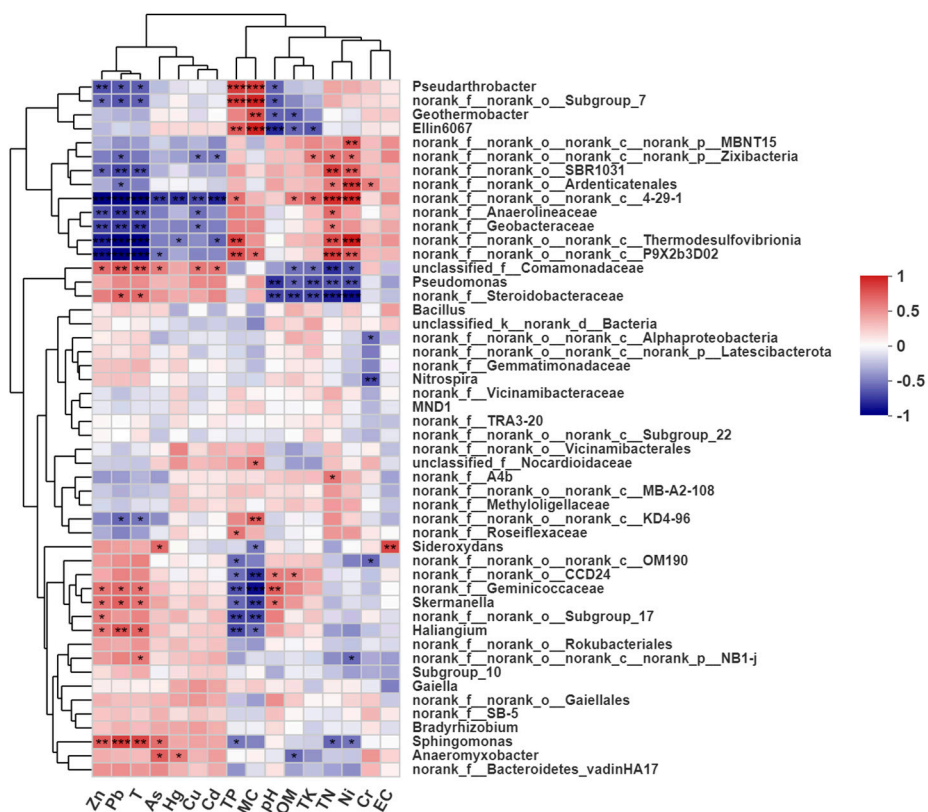

**Figure S2.** The Spearman correlation analysis of environmental factors and top genus of the control tests.
